# Supplementary material for: Synthesis and Fluorescence Properties of Structurally Characterized Heterobimetalic Cu(II)–Na(I) Bis(salamo)-Based Complex Bearing Square Planar, Square Pyramid and Triangular Prism Geometries of Metal Centers
Source: MDPI journal article supplement (doi:10.3390/molecules23051006), 2018-04-25

# checkCIF/PLATON report

You have not supplied any structure factors. As a result the full set of tests cannot be run.

THIS REPORT IS FOR GUIDANCE ONLY. IF USED AS PART OF A REVIEW PROCEDURE FOR PUBLICATION, IT SHOULD NOT REPLACE THE EXPERTISE OF AN EXPERIENCED CRYSTALLOGRAPHIC REFEREE.

No syntax errors found.      CIF dictionary      Interpreting this report

## Datablock: d845

---

|                 |                                        |                                        |
|-----------------|----------------------------------------|----------------------------------------|
| Bond precision: | C-C = 0.0055 A                         | Wavelength=0.71073                     |
| Cell:           | a=15.8326(3)                           | b=11.4630(2)      c=21.7834(4)         |
|                 | alpha=90                               | beta=98.135(2)      gamma=90           |
| Temperature:    | 155 K                                  |                                        |
|                 | Calculated                             | Reported                               |
| Volume          | 3913.67(13)                            | 3913.68(14)                            |
| Space group     | P 21/n                                 | P 21/n                                 |
| Hall group      | -P 2yn                                 | -P 2yn                                 |
| Moiety formula  | C32 H28 Cu2 N5 Na O13, C H C13, C H4 O | C32 H28 Cu2 N5 Na O13, C H4 O, C H C13 |
| Sum formula     | C34 H33 Cl3 Cu2 N5 Na O14              | C34 H33 Cl3 Cu2 N5 Na O14              |
| Mr              | 992.09                                 | 992.07                                 |
| Dx,g cm-3       | 1.684                                  | 1.684                                  |
| Z               | 4                                      | 4                                      |
| Mu (mm-1)       | 1.377                                  | 1.377                                  |
| F000            | 2016.0                                 | 2016.0                                 |
| F000'           | 2021.30                                |                                        |
| h,k,lmax        | 19,14,26                               | 19,14,26                               |
| Nref            | 7709                                   | 7694                                   |
| Tmin,Tmax       | 0.726,0.813                            | 0.845,1.000                            |
| Tmin'           | 0.711                                  |                                        |

Correction method= # Reported T Limits: Tmin=0.845 Tmax=1.000  
AbsCorr = MULTI-SCAN

Data completeness= 0.998      Theta(max)= 26.021

R(reflections)= 0.0478( 5555)      wR2(reflections)= 0.1112( 7694)

S = 1.027      Npar= 581

---

The following ALERTS were generated. Each ALERT has the format

**test-name\_ALERT\_alert-type\_alert-level.**

Click on the hyperlinks for more details of the test.

## ● Alert level C

|                   |                                                |                         |           |
|-------------------|------------------------------------------------|-------------------------|-----------|
| PLAT220_ALERT_2_C | Non-Solvent Resd 1 O                           | Ueq(max)/Ueq(min) Range | 3.6 Ratio |
| PLAT230_ALERT_2_C | Hirshfeld Test Diff for O11                    | --N5                    | 5.7 s.u.  |
| PLAT234_ALERT_4_C | Large Hirshfeld Difference O8                  | --C24                   | 0.18 Ang. |
| PLAT241_ALERT_2_C | High 'MainMol' Ueq as Compared to Neighbors of |                         | O11 Check |
| PLAT241_ALERT_2_C | High 'MainMol' Ueq as Compared to Neighbors of |                         | O12 Check |
| PLAT242_ALERT_2_C | Low 'MainMol' Ueq as Compared to Neighbors of  |                         | N5 Check  |
| PLAT244_ALERT_4_C | Low 'Solvent' Ueq as Compared to Neighbors of  |                         | C34 Check |
| PLAT410_ALERT_2_C | Short Intra H...H Contact H17                  | ..H22                   | 1.98 Ang. |

## ● Alert level G

|                   |                                                  |                |              |
|-------------------|--------------------------------------------------|----------------|--------------|
| PLAT003_ALERT_2_G | Number of Uiso or Uij Restrained non-H Atoms ... |                | 9 Report     |
| PLAT007_ALERT_5_G | Number of Unrefined Donor-H Atoms .....          |                | 1 Report     |
| PLAT012_ALERT_1_G | No _shelx_res_checksum Found in CIF .....        |                | Please Check |
| PLAT042_ALERT_1_G | Calc. and Reported MoietyFormula Strings Differ  |                | Please Check |
| PLAT186_ALERT_4_G | The CIF-Embedded .res File Contains ISOR Records |                | 2 Report     |
| PLAT232_ALERT_2_G | Hirshfeld Test Diff (M-X) Cu1                    | --O11          | 5.5 s.u.     |
| PLAT300_ALERT_4_G | Atom Site Occupancy of O7'                       | Constrained at | 0.6 Check    |
| PLAT300_ALERT_4_G | Atom Site Occupancy of O8                        | Constrained at | 0.6 Check    |
| PLAT300_ALERT_4_G | Atom Site Occupancy of O13                       | Constrained at | 0.62 Check   |
| PLAT300_ALERT_4_G | Atom Site Occupancy of O7                        | Constrained at | 0.4 Check    |
| PLAT300_ALERT_4_G | Atom Site Occupancy of O8'                       | Constrained at | 0.4 Check    |
| PLAT300_ALERT_4_G | Atom Site Occupancy of O13'                      | Constrained at | 0.38 Check   |
| PLAT300_ALERT_4_G | Atom Site Occupancy of C23                       | Constrained at | 0.6 Check    |
| PLAT300_ALERT_4_G | Atom Site Occupancy of C24                       | Constrained at | 0.6 Check    |
| PLAT300_ALERT_4_G | Atom Site Occupancy of C23'                      | Constrained at | 0.4 Check    |
| PLAT300_ALERT_4_G | Atom Site Occupancy of C24'                      | Constrained at | 0.4 Check    |
| PLAT300_ALERT_4_G | Atom Site Occupancy of H23A                      | Constrained at | 0.6 Check    |
| PLAT300_ALERT_4_G | Atom Site Occupancy of H23B                      | Constrained at | 0.6 Check    |
| PLAT300_ALERT_4_G | Atom Site Occupancy of H24A                      | Constrained at | 0.6 Check    |
| PLAT300_ALERT_4_G | Atom Site Occupancy of H24B                      | Constrained at | 0.6 Check    |
| PLAT300_ALERT_4_G | Atom Site Occupancy of H23C                      | Constrained at | 0.4 Check    |
| PLAT300_ALERT_4_G | Atom Site Occupancy of H23D                      | Constrained at | 0.4 Check    |
| PLAT300_ALERT_4_G | Atom Site Occupancy of H24C                      | Constrained at | 0.4 Check    |
| PLAT300_ALERT_4_G | Atom Site Occupancy of H24D                      | Constrained at | 0.4 Check    |
| PLAT301_ALERT_3_G | Main Residue Disorder .....                      | (Resd 1 )      | 9% Note      |
| PLAT333_ALERT_2_G | Large Aver C6-Ring C-C Dist. C12                 | -C21           | 1.43 Ang.    |
| PLAT395_ALERT_2_G | Deviating X-O-Y Angle From 120 for O3            |                | 111.1 Degree |
| PLAT395_ALERT_2_G | Deviating X-O-Y Angle From 120 for O8            |                | 112.7 Degree |
| PLAT395_ALERT_2_G | Deviating X-O-Y Angle From 120 for O7            |                | 113.1 Degree |
| PLAT431_ALERT_2_G | Short Inter HL..A Contact C13                    | ..O13'         | 3.03 Ang.    |
| PLAT860_ALERT_3_G | Number of Least-Squares Restraints .....         |                | 54 Note      |

0 **ALERT level A** = Most likely a serious problem - resolve or explain

0 **ALERT level B** = A potentially serious problem, consider carefully

8 **ALERT level C** = Check. Ensure it is not caused by an omission or oversight

31 **ALERT level G** = General information/check it is not something unexpected

2 **ALERT type 1** CIF construction/syntax error, inconsistent or missing data

13 **ALERT type 2** Indicator that the structure model may be wrong or deficient

2 **ALERT type 3** Indicator that the structure quality may be low

21 **ALERT type 4** Improvement, methodology, query or suggestion

1 **ALERT type 5** Informative message, check

---

It is advisable to attempt to resolve as many as possible of the alerts in all categories. Often the minor alerts point to easily fixed oversights, errors and omissions in your CIF or refinement strategy, so attention to these fine details can be worthwhile. In order to resolve some of the more serious problems it may be necessary to carry out additional measurements or structure refinements. However, the purpose of your study may justify the reported deviations and the more serious of these should normally be commented upon in the discussion or experimental section of a paper or in the "special\_details" fields of the CIF. checkCIF was carefully designed to identify outliers and unusual parameters, but every test has its limitations and alerts that are not important in a particular case may appear. Conversely, the absence of alerts does not guarantee there are no aspects of the results needing attention. It is up to the individual to critically assess their own results and, if necessary, seek expert advice.

### **Publication of your CIF in IUCr journals**

A basic structural check has been run on your CIF. These basic checks will be run on all CIFs submitted for publication in IUCr journals (*Acta Crystallographica*, *Journal of Applied Crystallography*, *Journal of Synchrotron Radiation*); however, if you intend to submit to *Acta Crystallographica Section C* or *E* or *IUCrData*, you should make sure that full publication checks are run on the final version of your CIF prior to submission.

### **Publication of your CIF in other journals**

Please refer to the *Notes for Authors* of the relevant journal for any special instructions relating to CIF submission.

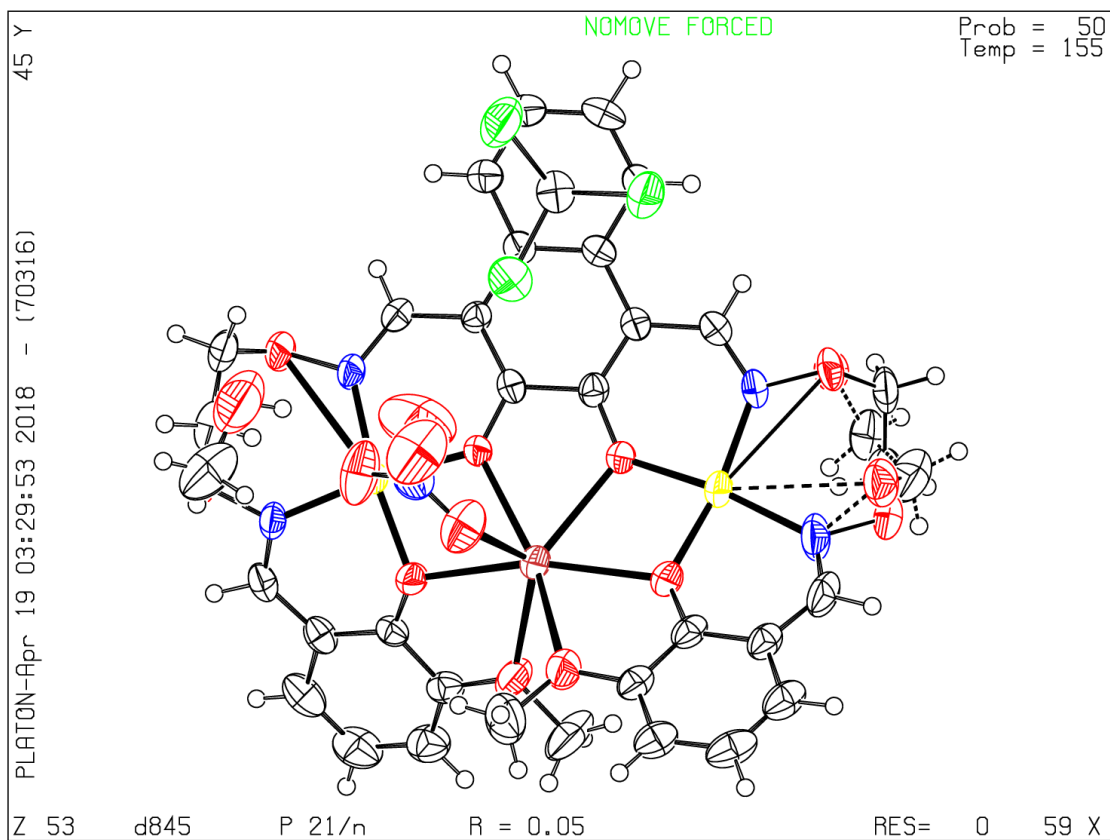

Supplement: s1 [file s1]
